# Supplementary material for: Association between continuous glucose monitoring-derived metrics and coronary plaque vulnerability: A retrospective exploratory analysis
Source: eLife. 2026 Jan 15;14:RP102860. doi: 10.7554/eLife.102860 (PMC12807456; doi:10.7554/eLife.102860)
Supplement: Supplementary file 1. [file elife-102860-supp1.docx]

**Supplementary File 1. Calculating formulae of the continuous glucose monitoring-derived indices.**

| Name | Formulae | Variables |
| --- | --- | --- |
| CGM_Mean |  | glucose measured  total number of readings |
| CGM_Std |  | glucose measured  total number of readings |
| CONGA |  | glucose measured  number of observations with an observation 60 min ago  time |
| LI |  | glucose measured  total number of readings  time |
| JINDEX |  |  |
| HBGI |  | nonlinear transformation of glucose measured  total number of readings  risk value associated with a high glucose |
| GRADE |  | glucose measured |
| MODD |  | glucose measured  number of observations with an observation 24 h ago  time |
| MAGE |  | blood glucose changes from peak to nadir  number of observations  1 Std of mean glucose for 24 h period |
| ADRR |  | total number of readings  risk value attributed to low glucose  risk value attributed to high glucose |
| M-value |  | glucose measured  number of observations IGV=ideal glucose value  time |
| MAG |  | glucose measured  total number of readings  total time |
| AC_Mean |  | autocorrelation of glucose  lag |
| AC_Var |  | autocorrelation of glucose  lag |
